# Supplementary material for: Genotype, Antifungal Susceptibility, and Virulence of Clinical South African Cryptococcus neoformans Strains from National Surveillance, 2005–2009
Source: MDPI journal article supplement (doi:10.3390/jof7050338), 2021-04-27
Supplement: s1 [file s1]

**Table S2:** Univariable logistic regression analysis to determine associations between clinical characteristics and infecting strain molecular type among South African patients infected with *Cryptococcus neoformans* serotype A ( $n = 246$ ), 2005-2009

| Exposure variables                               | Non-VNI genotype | VNI genotype | Univariable analysis |         |
|--------------------------------------------------|------------------|--------------|----------------------|---------|
|                                                  | N=40             | N=206        | OR (95% CI)          | p-value |
|                                                  | n/N (%)          | n/N (%)      |                      |         |
| <b>Sex</b>                                       |                  |              |                      |         |
| Male                                             | 29/110 (26)      | 81/110 (74)  | 5.24 (2.28-12.04)    | 0.001   |
| Female                                           | 8/125 (6)        | 117/125 (94) | reference            |         |
| Missing data (n)                                 | 3                | 8            |                      |         |
| <b>Age (years)</b>                               |                  |              |                      |         |
| <25                                              | 3/20 (15)        | 17/20 (85)   | reference            |         |
| 25-34                                            | 13/95 (14)       | 82/95 (86)   | 0.90 (0.23-3.50)     | 0.88    |
| 35-44                                            | 16/84 (19)       | 68/84 (81)   | 1.33 (0.35-5.11)     | 0.68    |
| >45                                              | 5/34 (15)        | 29/34 (85)   | 0.98 (0.21-4.61)     | 0.98    |
| Missing data (n)                                 | 3                | 10           |                      |         |
| <b>Year of diagnosis</b>                         |                  |              |                      |         |
| 2005                                             | 7/50 (14)        | 43/50 (86)   | reference            |         |
| 2006                                             | 10/53 (19)       | 43/53 (81)   | 1.43 (0.50-4.10)     | 0.51    |
| 2007                                             | 7/52 (13)        | 45/52 (87)   | 0.96 (0.31-2.95)     | 0.94    |
| 2008                                             | 9/48 (19)        | 39/48 (81)   | 1.42 (0.48-4.17)     | 0.53    |
| 2009                                             | 7/43 (16)        | 36/43 (84)   | 1.19 (0.38-3.72)     | 0.76    |
| <b>Province</b>                                  |                  |              |                      |         |
| Northern                                         | 18/123 (15)      | 105/123 (85) | 0.81 (0.40-1.61)     | 0.54    |
| Southern                                         | 20/114 (18)      | 94/114 (82)  | reference            |         |
| Missing data (n)                                 | 2                | 7            |                      |         |
| <b>Specimen type</b>                             |                  |              |                      |         |
| Cerebrospinal fluid (CSF)                        | 34/211 (16)      | 177/211 (84) | 2.69 (0.34-21.14)    | 0.35    |
| Blood                                            | 1/15 (7)         | 14/15 (93)   | reference            |         |
| Missing data (n)                                 | 5                | 15           |                      |         |
| <b>CD4+ T-cell count at diagnosis (cells/μl)</b> |                  |              |                      |         |
| ≤50                                              | 11/49 (22)       | 38/49 (78)   | 2.41 (0.61-9.52)     | 0.21    |
| >50                                              | 3/28 (11)        | 25/28 (89)   | reference            |         |
| Missing data (n)                                 | 26               | 143          |                      |         |
| <b>Antiretroviral treatment</b>                  |                  |              |                      |         |
| Yes                                              | 2/23 (9)         | 21/23 (91)   | 0.48 (0.10-2.23)     | 0.35    |
| No                                               | 19/115 (17)      | 96/115 (83)  | Reference            |         |
| Missing data (n)                                 | 19               | 89           |                      |         |
| <b>Mental status at diagnosis*</b>               |                  |              |                      |         |
| Alert                                            | 15/104 (14)      | 89/104 (86)  | 0.63 (0.27-1.49)     | 0.29    |
| Not alert                                        | 11/52 (21)       | 41/52 (79)   | reference            |         |
| Missing data (n)                                 | 14               | 76           |                      |         |
| <b>CSF India ink result</b>                      |                  |              |                      |         |
| Positive                                         | 27/164 (16)      | 137/164 (84) | 0.39 (0.03-4.50)     | 0.45    |
| Negative                                         | 1/3 (33)         | 2/3 (67)     | reference            |         |
| Missing data (n)                                 | 12               | 67           |                      |         |
| <b>CSF white cell count (cells/μl)</b>           |                  |              |                      |         |
| <5                                               | 7/56 (12.5)      | 49/56 (87.5) | 0.58 (0.22-1.50)     | 0.26    |
| ≥5                                               | 17/86 (20)       | 69/86 (80)   | reference            |         |
| Missing data (n)                                 | 16               | 88           |                      |         |
| <b>Current antifungal treatment</b>              |                  |              |                      |         |
| Fluconazole alone                                | 6/43 (14)        | 37/43 (86)   | reference            |         |
| Fluconazole and amphotericin B                   | 9/51 (18)        | 42/51 (82)   | 1.32 (0.43-4.06)     | 0.63    |
| Missing data (n)                                 | 25               | 127          |                      |         |
| <b>Current TB treatment</b>                      |                  |              |                      |         |
| Yes                                              | 6/36 (17)        | 30/36 (83)   | 1.22 (0.42-3.49)     | 0.72    |
| No                                               | 13/92 (14)       | 79/92 (86)   | reference            |         |
| Missing data (n)                                 | 21               | 97           |                      |         |

\*Mental status was categorised as "Alert" (Glasgow Coma Scale [GCS] score of 15) or "Not alert" (GCS score of <15 or recorded to be disorientated, stuporose or comatose).
