# Supplementary material for: Genotype, Antifungal Susceptibility, and Virulence of Clinical South African Cryptococcus neoformans Strains from National Surveillance, 2005–2009
Source: MDPI journal article supplement (doi:10.3390/jof7050338), 2021-04-27
Supplement: s1 [file s1]

**Table S6:** Characteristics of 15 South African patients infected with the *Cryptococcus neoformans* VNB molecular type collected during national laboratory-based surveillance for cryptococcosis, 2005-2009

| Isolate number | Home town/city | Province      | Specimen collection date | Syndrome                 | Facility name                              |
|----------------|----------------|---------------|--------------------------|--------------------------|--------------------------------------------|
| 205            | Meadowlands    | Gauteng       | 26/1/2005                | Meningitis               | Chris Hani Baragwanath                     |
| 892            | Soweto         | Gauteng       | 25/2/2006                | Meningitis               | Chris Hani Baragwanath                     |
| 1817           | Mangaung       | Free State    | 18/4/2006                | Meningitis               | Pelonomi                                   |
| 130            | Mthatha        | Eastern Cape  | 9/1/2009                 | Meningitis               | Nelson Mandela Academic/Mthatha Provincial |
| 2887           | Kroonstad      | Free State    | 29/8/2005                | Unknown                  | Boitumelo                                  |
| 3783           | Johannesburg   | Gauteng       | 26/10/2008               | Meningitis               | Chris Hani Baragwanath                     |
| 5873           | Soweto         | Gauteng       | 8/11/2006                | Meningitis and pneumonia | Chris Hani Baragwanath                     |
| 1239           | Orange Farm    | Gauteng       | 15/3/2007                | Meningitis               | Chris Hani Baragwanath                     |
| 907            | Soweto         | Gauteng       | 26/2/2006                | Meningitis               | Chris Hani Baragwanath                     |
| 3438           | Unknown        | North West    | 9/10/2005                | Unknown                  | Bophelong/Mafikeng                         |
| 1597           | Lenasia        | Gauteng       | 2/4/2006                 | Meningitis               | Chris Hani Baragwanath                     |
| 1543           | Tshwane        | Gauteng       | 16/7/2009                | Meningitis               | Steve Biko Pretoria Academic               |
| 1408           | Boksburg       | Gauteng       | 19/4/2005                | Unknown                  | Tambo Memorial                             |
| 637            | Scottburgh     | KwaZulu-Natal | 9/2/2005                 | Unknown                  | GJ Crooke's/Scottburgh                     |
| 2890           | Rouxville      | Free State    | 26/6/2008                | Pneumonia                | Pelonomi                                   |
