# Supplementary material for: Genotype, Antifungal Susceptibility, and Virulence of Clinical South African Cryptococcus neoformans Strains from National Surveillance, 2005–2009
Source: MDPI journal article supplement (doi:10.3390/jof7050338), 2021-04-27
Supplement: s1 [file s1]

**Table S1:** Characteristics of five South African patients infected with the *Cryptococcus neoformans* VNIV molecular type (serotype D) collected during national laboratory-based surveillance for cryptococcosis, 2005-2009

| Isolate number | Home town/city | Province        | Specimen collection date | Syndrome   | Facility name                             |
|----------------|----------------|-----------------|--------------------------|------------|-------------------------------------------|
| 3562           | Diepsloot      | Gauteng         | 21/7/2006                | Meningitis | Chris Hani Baragwanath                    |
| 1168           | Jeppeshtown    | Gauteng         | 12/3/2007                | Meningitis | Charlotte Maxeke<br>Johannesburg Academic |
| 1344           | Unknown        | Eastern<br>Cape | 22/2/2008                | Unknown    | Umtata General                            |
| 3331           | Cape Town      | Western<br>Cape | 14/8/2008                | Meningitis | Groote Schuur                             |
| 3991           | Jeppeshtown    | Gauteng         | 26/11/2008               | Unknown    | Charlotte Maxeke<br>Johannesburg Academic |
