# Supplementary material for: Genotype, Antifungal Susceptibility, and Virulence of Clinical South African Cryptococcus neoformans Strains from National Surveillance, 2005–2009
Source: MDPI journal article supplement (doi:10.3390/jof7050338), 2021-04-27
Supplement: s1 [file s1]

**Table S3:** Multivariable logistic regression analysis to determine associations between clinical characteristics and infecting strain molecular type among South African patients infected with *Cryptococcus neoformans* serotype A (n = 246), 2005-2009

| Exposure variables                                              | Non-VNI genotype<br>N=40 | VNI genotype<br>N=206 | Multivariable analysis |         |
|-----------------------------------------------------------------|--------------------------|-----------------------|------------------------|---------|
|                                                                 | n/N (%)                  | n/N (%)               | aOR (95% CI)           | p-value |
| <b>Sex</b>                                                      |                          |                       |                        |         |
| Male                                                            | 29/110 (26)              | 81/110 (74)           | 1.65 (0.25-10.99)      | 0.61    |
| Female                                                          | 8/125 (6)                | 117/125 (94)          | reference              |         |
| Missing data (n)                                                | 3                        | 8                     |                        |         |
| <b>Age (years)</b>                                              |                          |                       |                        |         |
| <25                                                             | 3/20 (15)                | 17/20 (85)            | reference              |         |
| 25-34                                                           | 13/95 (14)               | 82/95 (86)            | 0.62 (0.15-2.63)       | 0.52    |
| 35-44                                                           | 16/84 (19)               | 68/84 (81)            | 0.84 (0.20-3.50)       | 0.81    |
| >45                                                             | 5/34 (15)                | 29/34 (85)            | 0.47 (0.09-2.47)       | 0.38    |
| Missing data (n)                                                | 3                        | 10                    |                        |         |
| <b>CD4+ T-cell count at diagnosis (cells/<math>\mu</math>l)</b> |                          |                       |                        |         |
| $\leq 50$                                                       | 11/49 (22)               | 38/49 (78)            | 1.01 (0.13-7.95)       | 0.99    |
| >50                                                             | 3/28 (11)                | 25/28 (89)            | reference              |         |
| Missing data (n)                                                | 26                       | 143                   |                        |         |
| <b>Mental status at diagnosis*</b>                              |                          |                       |                        |         |
| Alert                                                           | 15/104 (14)              | 89/104 (86)           | 0.43 (0.06-2.96)       | 0.39    |
| Not alert                                                       | 11/52 (21)               | 41/52 (79)            | reference              |         |
| Missing data (n)                                                | 14                       | 76                    |                        |         |
| <b>CSF white cell count (cells/<math>\mu</math>l)</b>           |                          |                       |                        |         |
| <5                                                              | 7/56 (12.5)              | 49/56 (87.5)          | 0.65 (0.10-4.37)       | 0.66    |
| $\geq 5$                                                        | 17/86 (20)               | 69/86 (80)            | reference              |         |
| Missing data (n)                                                | 16                       | 88                    |                        |         |

\*Mental status was categorised as "Alert" (Glasgow Coma Scale [GCS] score of 15) or "Not alert" (GCS score of <15 or recorded to be disorientated, stuporose or comatose).
