# Supplementary material for: Genotype, Antifungal Susceptibility, and Virulence of Clinical South African Cryptococcus neoformans Strains from National Surveillance, 2005–2009
Source: MDPI journal article supplement (doi:10.3390/jof7050338), 2021-04-27
Supplement: s1 [file s1]

**Table S4:** Univariable logistic regression analysis to determine associations between infecting strain molecular type and in-hospital outcome among South African patients ( $n = 180$ ) infected with *Cryptococcus neoformans* serotype A, 2005-2009

| Exposure variables                                              | Died        | Survived     | Univariable analysis |         |
|-----------------------------------------------------------------|-------------|--------------|----------------------|---------|
|                                                                 | N=64        | N=116        |                      |         |
|                                                                 | n/N (%)     | n/N (%)      | OR (95% CI)          | p-value |
| <b>Molecular type</b>                                           |             |              |                      |         |
| Non-VNI                                                         | 9/31 (29)   | 22/31 (71)   | 0.69 (0.29-1.61)     | 0.39    |
| VNI                                                             | 54/145 (37) | 91/145 (63)  | reference            |         |
| Missing data (n)                                                | 1           | 3            |                      |         |
| <b>Sex</b>                                                      |             |              |                      |         |
| Male                                                            | 30/84 (36)  | 54/84 (64)   | 0.59 (0.24-1.47)     | 0.25    |
| Female                                                          | 33/95 (35)  | 62/95 (65)   | reference            |         |
| Missing data (n)                                                | 1           | 0            |                      |         |
| <b>Age (years)</b>                                              |             |              |                      |         |
| <25                                                             | 6/17 (35)   | 11/17 (65)   | reference            |         |
| 25-34                                                           | 27/68 (40)  | 41/68 (60)   | 1.15 (0.38-3.49)     | 0.81    |
| 35-44                                                           | 21/69 (30)  | 48/69 (70)   | 0.83 (0.27-2.54)     | 0.74    |
| >45                                                             | 10/26 (38)  | 16/26 (62)   | 1.33 (0.37-4.80)     | 0.67    |
| <b>Year of diagnosis</b>                                        |             |              |                      |         |
| 2005                                                            | 4/14 (29)   | 10/14 (71)   | reference            |         |
| 2006                                                            | 15/42 (36)  | 27/42 (64)   | 1.47 (0.39-5.54)     | 0.57    |
| 2007                                                            | 16/43 (37)  | 27/43 (63)   | 1.54 (0.41-5.76)     | 0.52    |
| 2008                                                            | 12/43 (28)  | 31/43 (72)   | 0.93 (0.24-3.61)     | 0.92    |
| 2009                                                            | 17/38 (45)  | 21/38 (55)   | 2.06 (0.55-7.77)     | 0.29    |
| <b>Hospital</b>                                                 |             |              |                      |         |
| Academic                                                        | 36/100 (36) | 64/100 (64)  | 0.69 (0.30-1.60)     | 0.39    |
| Regional                                                        | 28/80 (35)  | 52/80 (65)   | reference            |         |
| <b>Specimen type</b>                                            |             |              |                      |         |
| Cerebrospinal fluid (CSF)                                       | 55/160 (34) | 105/160 (66) | 0.66 (0.27-1.62)     | 0.37    |
| Blood                                                           | 5/14 (36)   | 9/14 (64)    | reference            |         |
| Missing data (n)                                                | 4           | 2            |                      |         |
| <b>CD4+ T-cell count at diagnosis (cells/<math>\mu</math>l)</b> |             |              |                      |         |
| $\leq 50$                                                       | 17/50 (34)  | 33/50 (66)   | 0.26 (0.05-1.42)     | 0.09    |
| $> 50$                                                          | 8/28 (29)   | 20/28 (71)   | reference            |         |
| Missing data (n)                                                | 39          | 63           |                      |         |
| <b>Antiretroviral treatment</b>                                 |             |              |                      |         |
| Yes                                                             | 7/23 (30)   | 16/23 (70)   | 0.49 (0.15-1.58)     | 0.22    |
| No                                                              | 36/119 (30) | 83/119 (70)  | reference            |         |
| Missing data (n)                                                | 21          | 17           |                      |         |
| <b>Mental status at diagnosis*</b>                              |             |              |                      |         |
| Alert                                                           | 29/105 (28) | 76/105 (72)  | 0.63 (0.24-1.67)     | 0.35    |
| Not alert                                                       | 23/54 (43)  | 31/54 (57)   | reference            |         |
| Missing data (n)                                                | 12          | 9            |                      |         |
| <b>CSF white cell count (cells/<math>\mu</math>l)</b>           |             |              |                      |         |
| $< 5$                                                           | 20/41 (49)  | 21/41 (51)   | 1.22 (0.42-3.52)     | 0.72    |
| $\geq 5$                                                        | 16/67 (24)  | 51/67 (76)   | reference            |         |
| Missing data (n)                                                | 28          | 44           |                      |         |
| <b>Current antifungal treatment</b>                             |             |              |                      |         |
| Fluconazole alone                                               | 11/45 (24)  | 34/45 (76)   | reference            |         |
| Fluconazole and amphotericin B                                  | 13/52 (25)  | 39/52 (75)   | 1.02 (0.40-2.62)     | 0.96    |
| Missing data (n)                                                | 40          | 43           |                      |         |
| <b>TB treatment</b>                                             |             |              |                      |         |
| Yes                                                             | 15/37 (41)  | 22/37 (59)   | 0.73 (0.24-2.23)     | 0.58    |
| No                                                              | 26/95 (27)  | 69/95 (73)   | reference            |         |
| Missing data (n)                                                | 23          | 25           |                      |         |

\*Mental status was categorised as "Alert" (Glasgow Coma Scale [GCS] score of 15) or "Not alert" (GCS score of  $< 15$  or recorded to be disorientated, stuporose or comatose).
