# Supplementary material for: Genotype, Antifungal Susceptibility, and Virulence of Clinical South African Cryptococcus neoformans Strains from National Surveillance, 2005–2009
Source: MDPI journal article supplement (doi:10.3390/jof7050338), 2021-04-27
Supplement: s1 [file s1]

**Table S5:** Multivariable logistic regression analysis to determine associations between infecting strain molecular type and in-hospital outcome among South African patients ( $n = 180$ ) infected with *Cryptococcus neoformans* serotype A, 2005-2009

| Exposure variables                                              | Died<br>N=64 | Survived<br>N=116 | Multivariable analysis |         |
|-----------------------------------------------------------------|--------------|-------------------|------------------------|---------|
|                                                                 | n/N (%)      | n/N (%)           | aOR (95% CI)           | p-value |
| <b>Molecular type</b>                                           |              |                   |                        |         |
| Non-VNI                                                         | 9/31 (29)    | 22/31 (71)        | 0.50 (0.03-7.57)       | 0.62    |
| VNI                                                             | 54/145 (37)  | 91/145 (63)       | reference              |         |
| Missing data (n)                                                | 1            | 3                 |                        |         |
| <b>Sex</b>                                                      |              |                   |                        |         |
| Male                                                            | 30/84 (36)   | 54/84 (64)        | 0.56 (0.06-5.60)       | 0.62    |
| Female                                                          | 33/95 (35)   | 62/95 (65)        | reference              |         |
| Missing data (n)                                                | 1            | 0                 |                        |         |
| <b>Age (years)</b>                                              |              |                   |                        |         |
| <25                                                             | 6/17 (35)    | 11/17 (65)        | reference              |         |
| 25-34                                                           | 27/68 (40)   | 41/68 (60)        | 0.25 (0.01-9.87)       | 0.46    |
| 35-44                                                           | 21/69 (30)   | 48/69 (70)        | 0.35 (0.01-14.84)      | 0.58    |
| >45                                                             | 10/26 (38)   | 16/26 (62)        | 0.55 (0.01-46.60)      | 0.79    |
| <b>CD4+ T-cell count at diagnosis (cells/<math>\mu</math>l)</b> |              |                   |                        |         |
| $\leq 50$                                                       | 17/50 (34)   | 33/50 (66)        | 1.15 (0.13-10.29)      | 0.90    |
| >50                                                             | 8/28 (29)    | 20/28 (71)        | reference              |         |
| Missing data (n)                                                | 39           | 63                |                        |         |
| <b>Antiretroviral treatment</b>                                 |              |                   |                        |         |
| Yes                                                             | 7/23 (30)    | 16/23 (70)        | 20.20 (0.88-464.75)    | 0.06    |
| No                                                              | 36/119 (30)  | 83/119 (70)       | reference              |         |
| Missing data (n)                                                | 21           | 17                |                        |         |
| <b>Mental status at diagnosis*</b>                              |              |                   |                        |         |
| Alert                                                           | 29/105 (28)  | 76/105 (72)       | 0.16 (0.01-2.10)       | 0.16    |
| Not alert                                                       | 23/54 (43)   | 31/54 (57)        | reference              |         |
| Missing data (n)                                                | 12           | 9                 |                        |         |
| <b>Current antifungal treatment</b>                             |              |                   |                        |         |
| Fluconazole alone                                               | 11/45 (24)   | 34/45 (76)        | reference              |         |
| Fluconazole and amphotericin                                    | 13/52 (25)   | 39/52 (75)        | 2.56 (0.22-30.21)      | 0.46    |
| Missing data (n)                                                | 40           | 43                |                        |         |

\*Mental status was categorised as "Alert" (Glasgow Coma Scale [GCS] score of 15) or "Not alert" (GCS score of <15 or recorded to be disorientated, stuporose or comatose).
